# Supplementary material
Source: PubMed Central journal article supplement (PMC5903581)

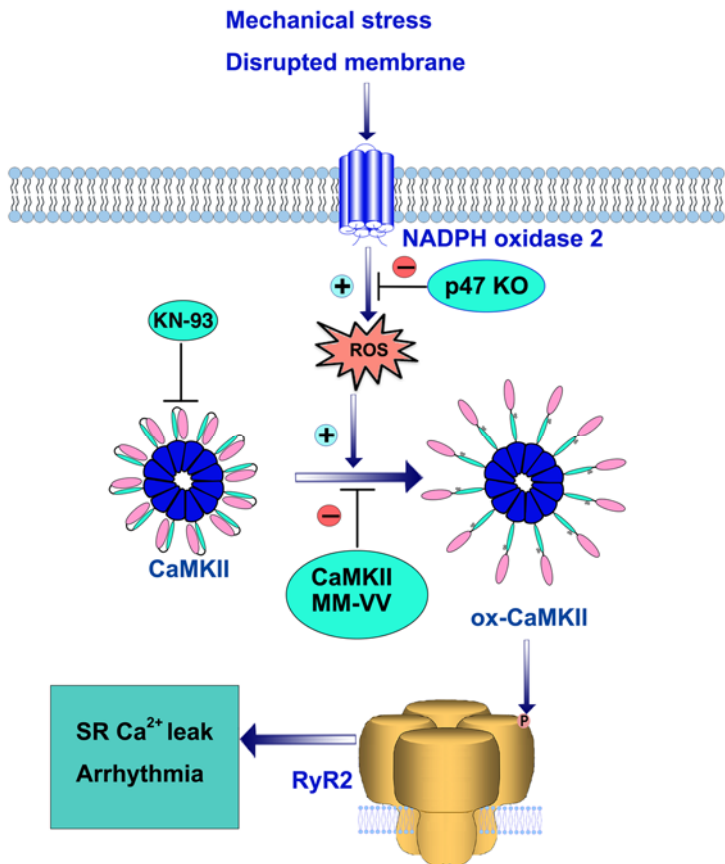

Supplement: NIHMS952926-supplement-005682_graphic_abstract.pdf [file NIHMS952926-supplement-005682_graphic_abstract.pdf]
